# Supplementary material for: N, S co-doped coal-based activated carbon as a high-efficiency and durable metal-free catalyst for the oxygen reduction reaction in Zn–air batteries
Source: Royal Society of Chemistry journal article supplement (doi:10.1039/d3nj04222g), 2023-01-01
Supplement: d3nj04222g1.pdf [file d3nj04222g1.pdf]

# Supporting Information

## **N, S Co-doped Coal-based Activated Carbon as a High-efficiency and Durable Metal-free Catalyst for the Oxygen Reduction Reaction in Zn-air Batteries**

Xueyan Wu,<sup>†\*</sup> Yang Yang<sup>†</sup>, Yan Lv, Xiuli Zhang, Jiabin Li and Jixi Guo<sup>\*</sup>

State Key Laboratory of Chemistry and Utilization of Carbon Based Energy Resources,  
College of Chemistry, Xinjiang University, 830017 Urumqi, China.

Email: Wuxy90@xju.edu.cn, jxguo1012@163.com

Fax: +86-991-8588883, Tel: +86-991-8583083.

<sup>†</sup>Y.Y. and X.W. contributed equally to this work.

## **1. Materials Characterization**

Powder X-ray diffraction (XRD) measurements were performed on Bruker D8 Advance diffractometer with Cu K $\alpha$  radiation ( $\lambda=0.15406$  nm). The morphologies and the structures of the samples were characterized using field-emission scanning electron microscopy (FESEM; Hitachi SU-4800) and transmission electron microscopy (TEM; JEM-2100F). Raman spectra measurements were conducted using a multichannel modular triple Raman system, with confocal microscopy at room temperature and an excitation wavelength of 532 nm (HR Evolution). The Brunauer-Emmett-Teller (BET) specific surface area was determined by nitrogen adsorption-desorption isotherm measurements at 77 K (ASAP 2020). XPS measurements were performed on an X-ray photoelectron spectrometer (Thermo ESCALAB 250). The superficial functional groups of samples were obtained by Fourier transform infrared (VERTEX 70) spectrophotometer. Evaluation of surface wettability of materials employing DCAT 21.

## 2. Details supplement

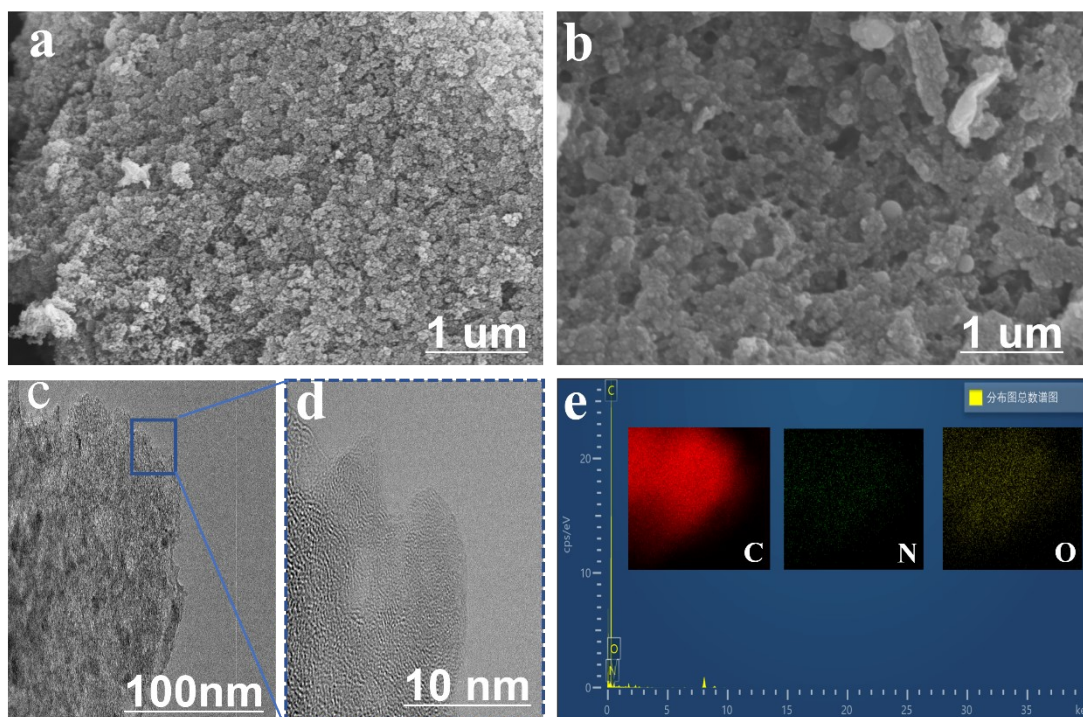

**Figure S1:** a, b) SEM images of AC and N-AC; c, d) TEM and HRTEM images of N-AC; e) EDS elemental mapping images of N-AC.

**Table S1: The samples of BET surface area and pore volume**

| Samples | BET surface area<br>( $\text{m}^2 \text{g}^{-1}$ ) | pore volume <sup>a</sup><br>( $\text{cm}^3 \text{g}^{-1}$ ) |
|---------|----------------------------------------------------|-------------------------------------------------------------|
| AC      | 1042.5                                             | 0.65                                                        |
| N-AC    | 1146.3                                             | 0.71                                                        |
| N,S-AC  | 1153.9                                             | 0.74                                                        |

<sup>a</sup>: Pore volume is calculated by the Barret-Joyner-Halenda model.

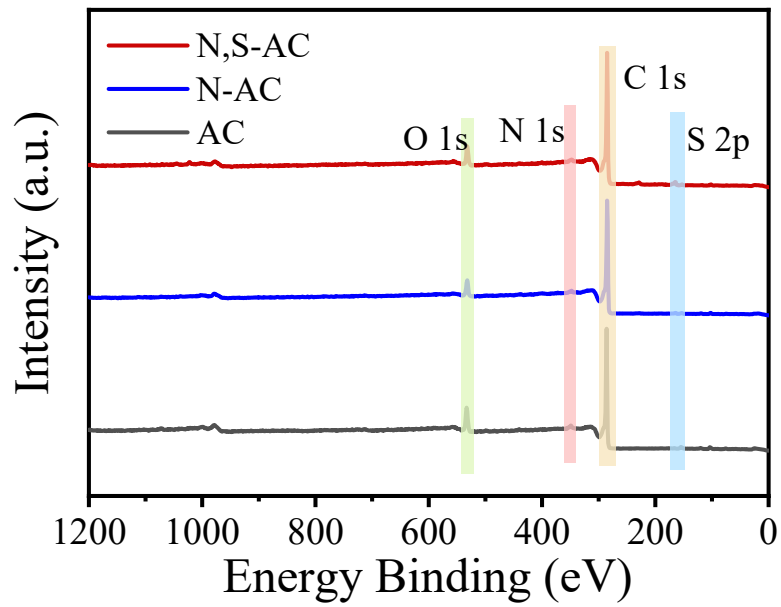

**Figure S2:** XPS survey spectra of AC; N-AC and N,S-AC.

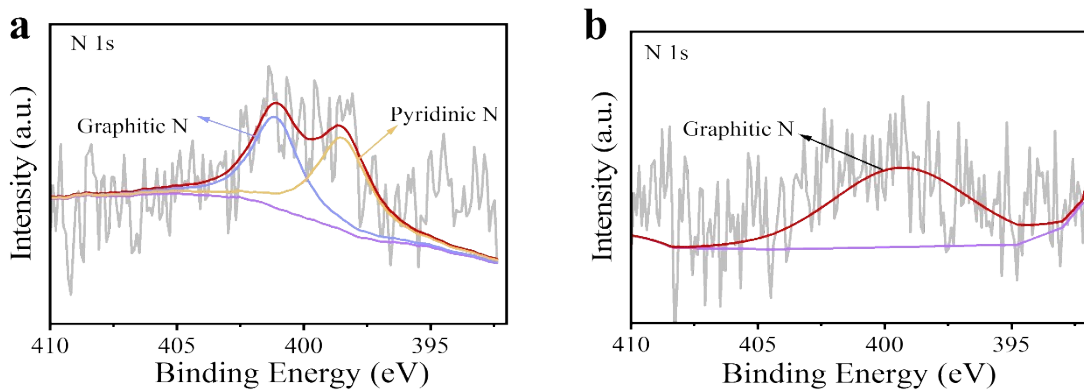

**Figure S3:** N 1s XPS spectra of (a) N-AC and (b) AC.

**Table S2:** The atomic percentage of S, N, C, and O elements based on XPS analysis.

|        | N,S-AC | N-AC  | AC    |
|--------|--------|-------|-------|
| N(at%) | 6.58   | 0.69  | 0.14  |
| S(at%) | 0.65   | /     | /     |
| C(at%) | 82.64  | 92.80 | 91.74 |
| O(at%) | 10.13  | 6.51  | 8.12  |

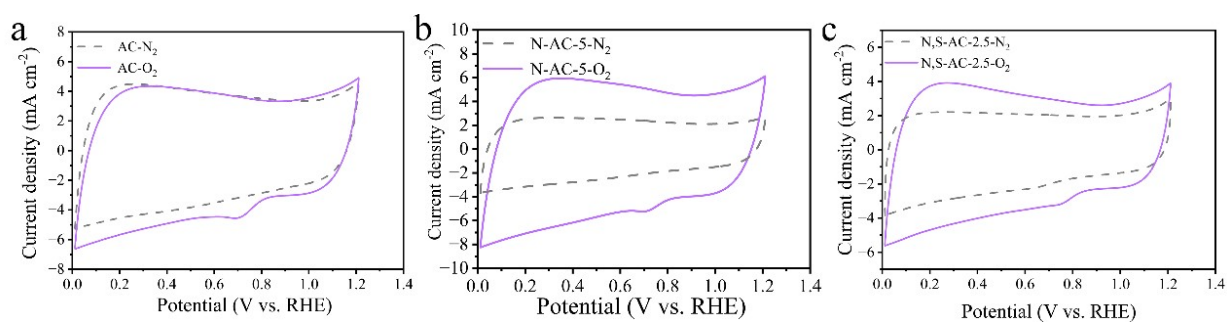

**Figure S4:** CV curves of a) AC, b) N-AC, and c) N,S-AC in N<sub>2</sub>-saturated (dashed line) and O<sub>2</sub>-saturated (solid line) 0.1 M KOH solution.

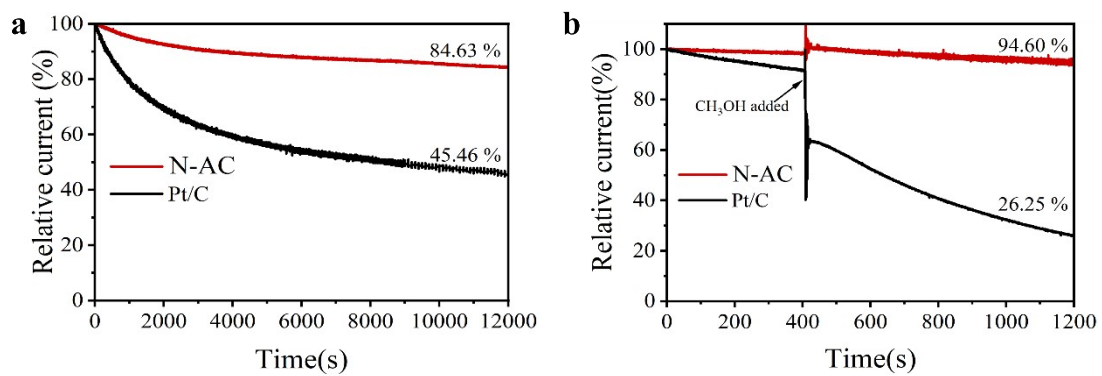

**Figure S5:** a) I-t test of N-AC and 20 % Pt/C in an O<sub>2</sub>-saturated 0.1 M KOH electrolyte; b) Methanol tolerance test of N-AC and 20 % Pt/C catalysts in O<sub>2</sub>-saturated 0.1 M KOH electrolyte.

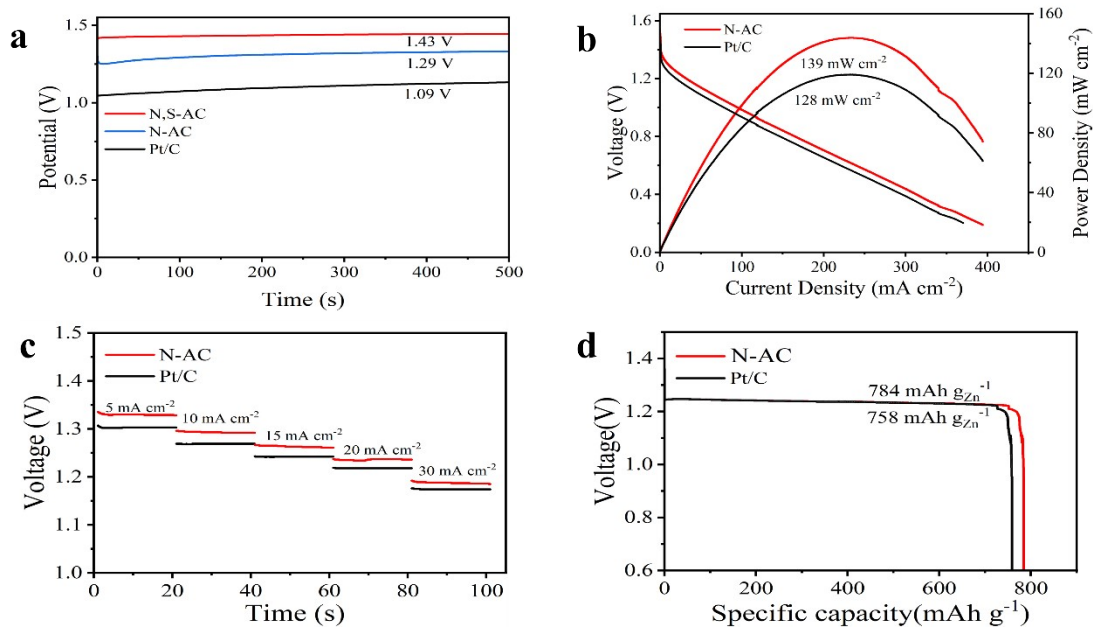

**Figure S6:** a) Open-circuit voltage plots of the N,S-AC, N-AC, and Pt/C; b) Polarization curves and corresponding power density curves of the N-AC and 20% Pt/C; c) Discharge curves at different current densities from 5 to 30 mA cm<sup>-2</sup>; d) Voltage-specific capacity curves of N-AC and 20% Pt/C-based ZABs at a current density of 10 mA cm<sup>-2</sup>.

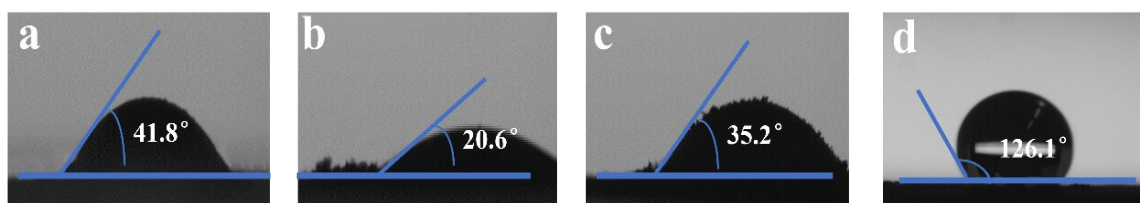

**Figure S7:** Contact angles for water droplets on pressed pellets of different samples: a) AC; b) N-AC; c) N,S-AC; d) Pt/C.

**Table S3:** Comparison of electrocatalytic performances between our N, S-AC sample and recently reported electrocatalysts applied in Zn-air battery.

| Catalysts        | $E_{1/2}$ (V) | $J_L$ (mA cm <sup>-2</sup> ) | Peak Power Density (mW cm <sup>-2</sup> ) | Ref.      |
|------------------|---------------|------------------------------|-------------------------------------------|-----------|
| N, S-AC          | 0.79          | 6.35                         | 142                                       | This Work |
| N, S@CM-1000     | 0.76          | 5.5                          | 90                                        | 1         |
| NSG              | 0.75          | 4.85                         | /                                         | 2         |
| PSN-G1           | 0.79          | /                            | /                                         | 3         |
| G100-1B          | 0.77          | 4.56                         | /                                         | 4         |
| S-POP            | 0.72          | 5.10                         | /                                         | 5         |
| N,S-GNR-2s       | 0.79          | 5.06                         | /                                         | 6         |
| N-graphene@N-rGO | 0.86          | /                            | 139                                       | 7         |
| PANZ@CNTs75      | 0.73          | 4.30                         | 201.9                                     | 8         |
| HEO/Co NC        | 0.65          | /                            | 162                                       | 9         |
| NF @ CB          | 0.81          | 5.26                         | 130                                       | 10        |
| CNTs             | 0.78          | 4.25                         | 94.8                                      | 11        |
| NPNC-2           | 0.77          | /                            | 145                                       | 12        |



## References

1. J. Yang, F. Xiang, H. Guo, L. Wang and X. Niu, *Carbon*, 2020, **156**, 514-522.
2. Z. Moosapour Siahkalroudi, B. Aghabarari, M. Vaezi, E. Rodríguez-Castellón and M. V. Martínez-Huerta, *Molecular Catalysis*, 2021, **502**, 111372.
3. Y. Wu, W. Shuang, L. Yang and C. Cao, *Dalton Transactions*, 2023, **52**, 4389.
4. S. Nagappan, M. Duraivel, S. Han, M. Yusuf, M. Mahadadalkar, K. Park, A. Dhakshinamoorthy, K. Prabakar, S. Park, C.-S. Ha, J.-M. Lee and K. H. Park, *Nanomaterials*, 2023, **13**, 1315.
5. W. Yan, S. Cao, Z. Xiao, F. Dai, T. Xing, Z. Li, Y. Chen, X. Lu and X. Li, *Electrochimica Acta*, 2021, **377**, 138107.
6. B. Li, T. Xiang, Y. Shao, F. Lv, C. Cheng, J. Zhang, Q. Zhu, Y. Zhang and J. Yang, *Nanomaterials*, 2022, **12**, 3306.
7. R. Song, X. Cao, X. Zhou and N. Yuan, *New Journal of Chemistry*, 2021, **45**, 21716-21724.
8. Y. Zhang, J. Liu, Z. Fang, X. Lin, W. Zhang and D. Yu, *Chemistry an Asian Journal*, 2020, **15**, 1544-1548.
9. T. Yu, H. Xu, Z. Jin, Y. Zhang and H.-J. Qiu, *Applied Surface Science*, 2023, **610**, 155624.
10. P. Zhu, J. Gao, X. Chen and S. Liu, *International Journal of Hydrogen Energy*, 2020, **45**, 9512-9521.
11. Y. Guo, S. Yao, L. Gao, A. Chen, M. Jiao, H. Cui and Z. Zhou, *Journal of Materials Chemistry A*, 2020, **8**, 4386-4395.
12. S. Chen, M. Cui, Z. Yin, Q. Zeng, Z. Cao, J. Xiong, L. Mi and Y. Li, *ChemElectroChem*, 2020, **7**, 4131-4135.
